# Supplementary material for: The Capillary Morphogenesis Gene 2 Triggers the Intracellular Hallmarks of Collagen VI-Related Muscular Dystrophy
Source: MDPI journal article supplement (doi:10.3390/ijms23147651), 2022-07-11
Supplement: s1 [file s1]

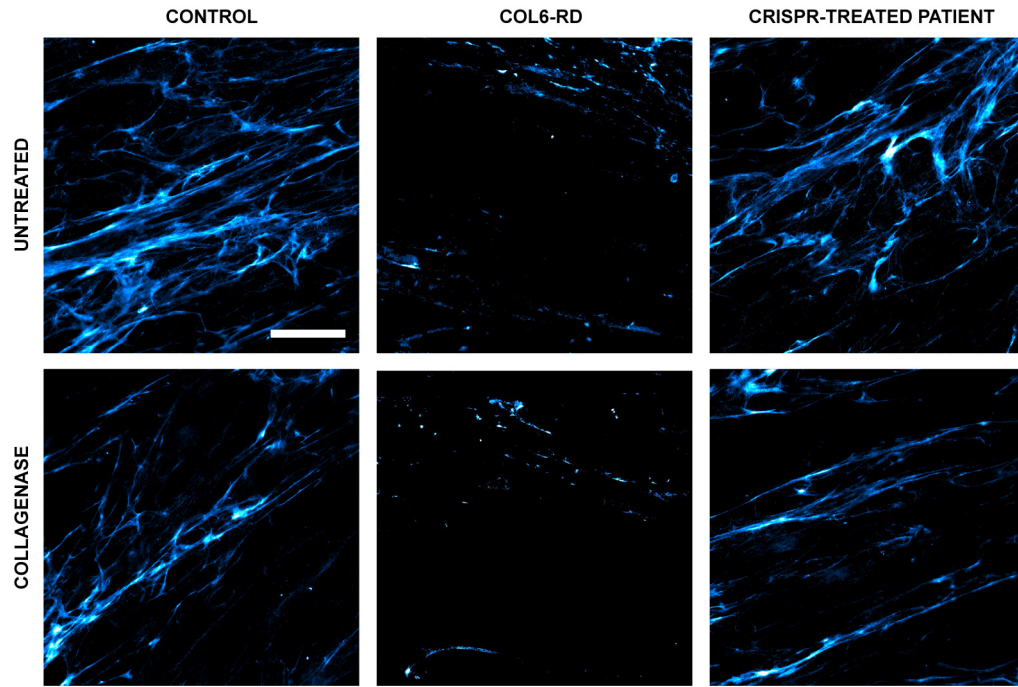

**Figure S1.** STED imaging of extracellular collagen VI. Representative STED images of the extracellular collagen VI matrix in untreated (upper panel) and mild collagenase-treated (lower panel) fibroblasts derived from control and COL6-RD patient, and CRISPR-treated COL6-RD patient-derived fibroblasts. Scale bar 5  $\mu$ m.

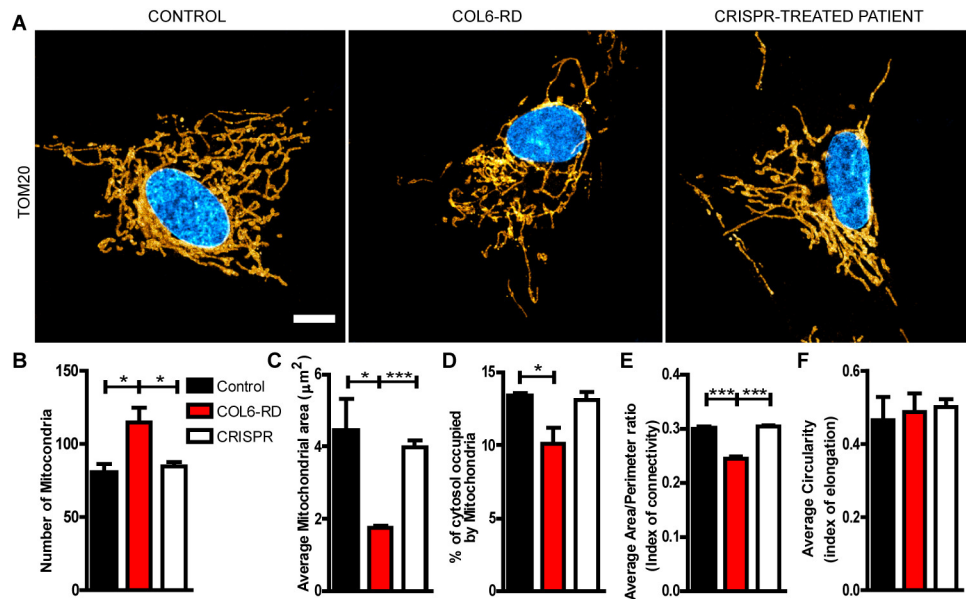

**Figure S2.** Mitochondrial morphology and content imbalance in COL6-RD patient-derived fibroblasts. (A) Representative STED images of control and COL6-RD patient-derived fibroblasts, and CRISPR-treated COL6-RD patient-derived fibroblasts, labelled with Tom-20 (yellow) and dapi for the nuclear staining (blue). Scale bar 5  $\mu$ m. (B) The number of Tom-20-positive organelles, (C) the average mitochondrial area, (D) the mitochondrial content of the cytoplasm, (E) the index of connectivity and (F) elongation of the mitochondria was quantified. Data are expressed as the mean  $\pm$  SEM.  $n = 3$  independent primary cell preparations were used for all panels. \* $p < 0.05$ , \*\* $p < 0.01$ , \*\*\* $p < 0.001$ ; one-way ANOVA/Bonferroni's multiple comparison test.

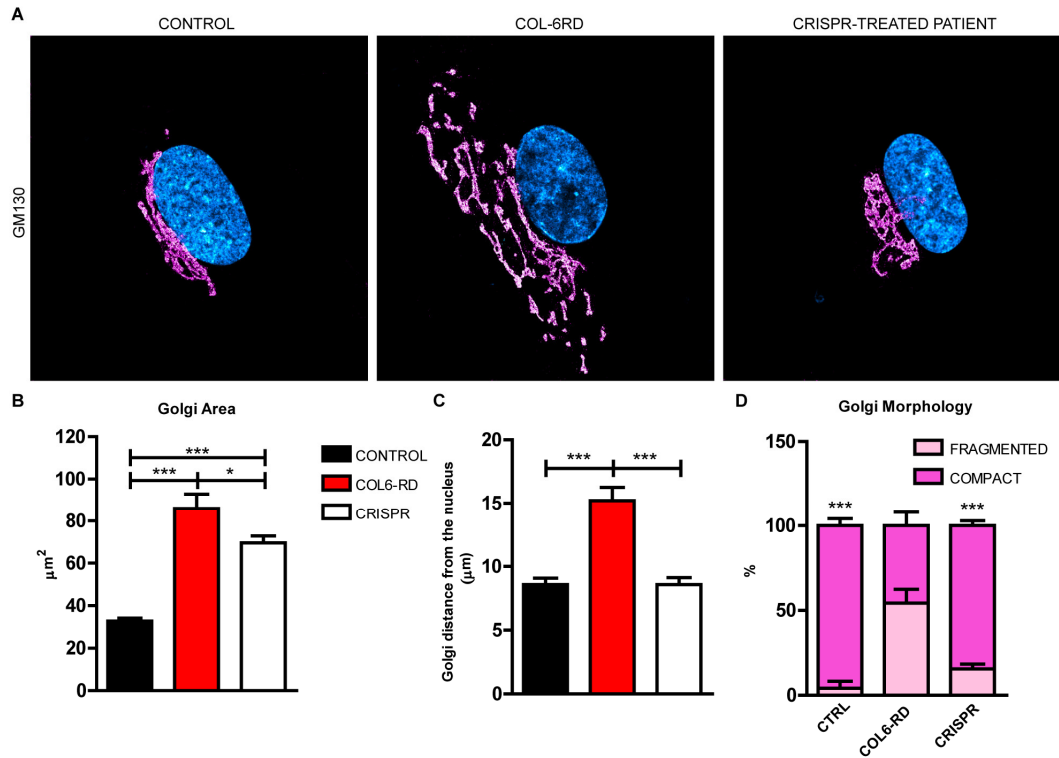

**Figure S3.** COL6-RD patient-derived fibroblast show fragmented Golgi apparatus morphology. (A) Representative STED images of control and COL6-RD patient-derived fibroblasts, and CRISPR-treated COL6-RD patient-derived fibroblasts, labelled with Gm130 (magenta) and dapi for the nuclear staining (blue). Scale bar 5  $\mu\text{m}$ . The Golgi apparatus's area (B), distance from the nucleus (C), and fragmentation levels (D) were quantified. Data are expressed as the mean  $\pm$  SEM.  $n = 3$  independent primary cell preparations were used for all panels. \* $p < 0.05$ , \*\* $p < 0.01$ , \*\*\* $p < 0.001$ ; one-way (B, C) and two-way (D) ANOVA/Bonferroni's multiple comparison test.

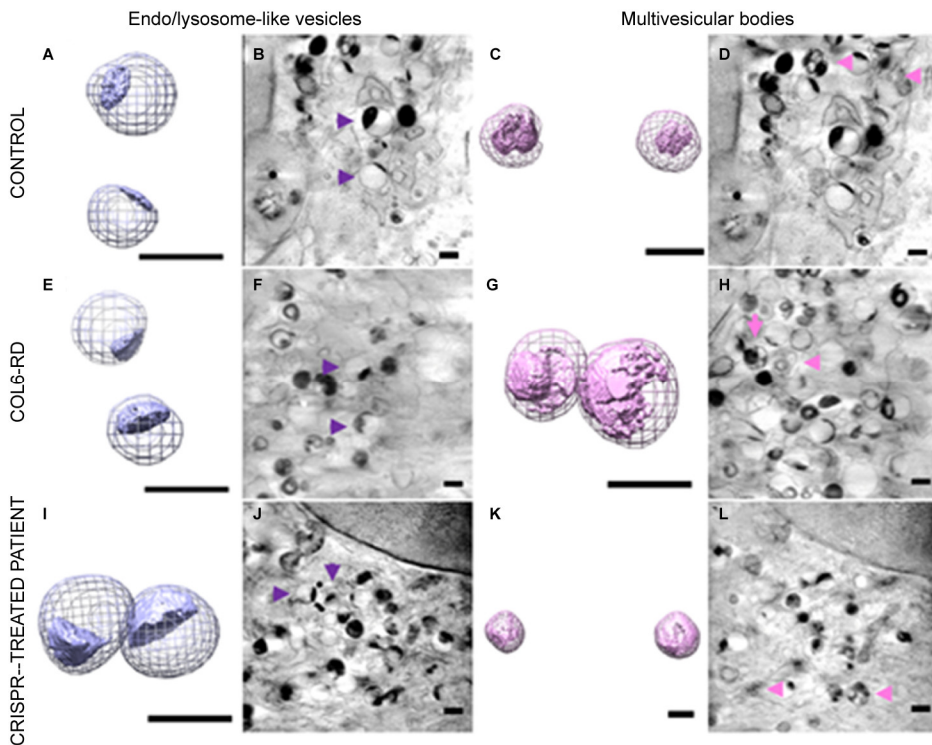

**Figure S4.** Morphological recognition of endosome/lysosome-like vesicles and multivesicular bodies in patient-derived fibroblasts. Three-dimensional reconstruction with threshold-based isosurface segmentation of the surface boundaries identifies the endosome/lysosome-like vesicles in violet (A, E, J) and multivesicular bodies

in pink (C, G, L). Volume slices of the tomograms from control (B, D), COL6-RD patient (F, H) and CRISPR-treated fibroblasts (K, M) where the 3D segmented structure is shown in the volume slice. Violet and pink arrows in B, D, F, H, K, and M point out the endo/lysosome-like vesicles and the multivesicular bodies respectively. Scale bar 0.5  $\mu$ m.

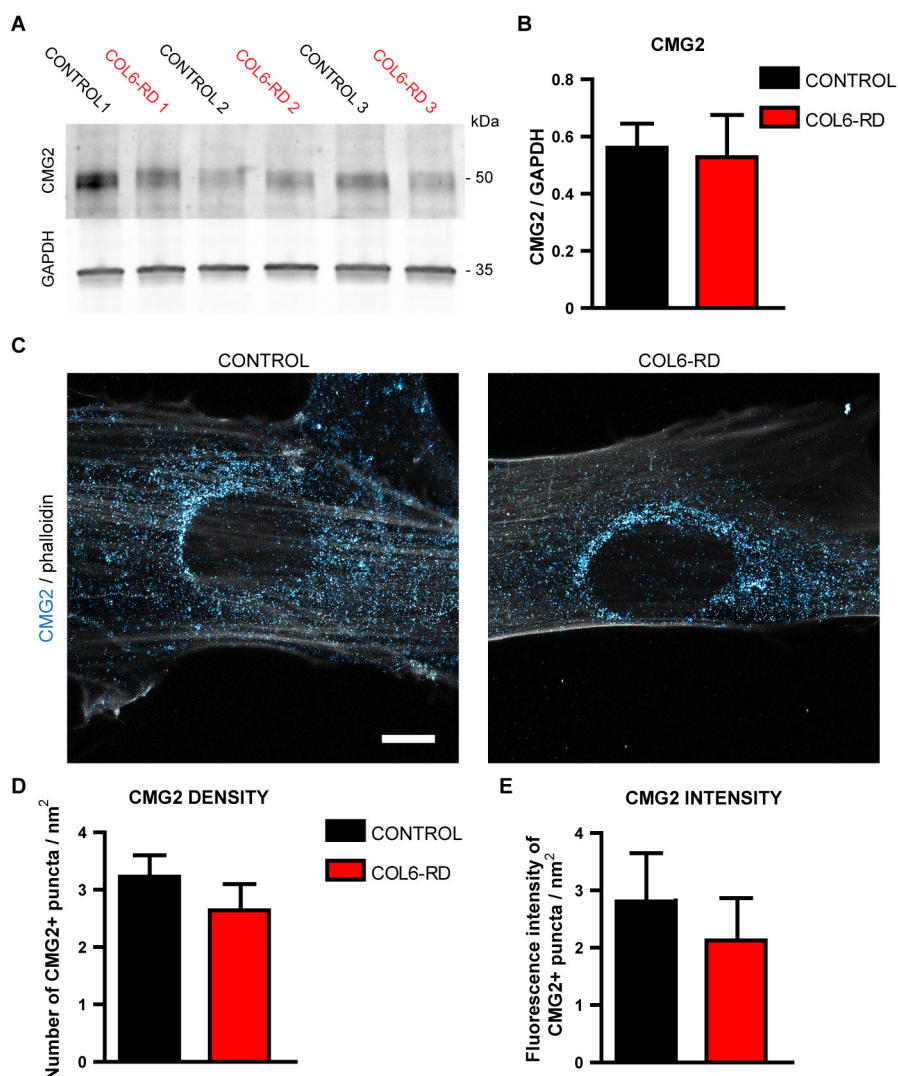

**Figure S5.** Patient-derived fibroblasts express CMG2 receptor. (A) Primary fibroblasts homogenates from controls and COL6-RD patients were subjected to Western blotting using antibodies against CMG2. The Gapdh marker was used as loading control. (B) Quantification of CMG2 versus Gapdh from both genotypes. (C) Representative STED images of patient-derived fibroblasts labelled with antibodies against phalloidin (white) and CMG2 (cyan), and relative quantification of (D) number of positive CMG puncta and (E) CMG2 fluorescence intensity from both genotypes. Data are expressed as the mean  $\pm$  SEM.  $n = 3$  independent primary cell preparations were used for all panels. Scale bar 5  $\mu$ m.
